# Supplementary material for: Measurement of Fumonisins in Maize Using a Portable Mass Spectrometer
Source: MDPI journal article supplement (doi:10.3390/toxins14080523), 2022-07-30
Supplement: s1 [file s1]

# Supplementary Materials: Measurement of Fumonisin in Maize Using a Portable Mass Spectrometer

Chris M. Maragos, Kristin Barnett, Luke Morgan, Martha M. Vaughan and Kristal K. Sieve

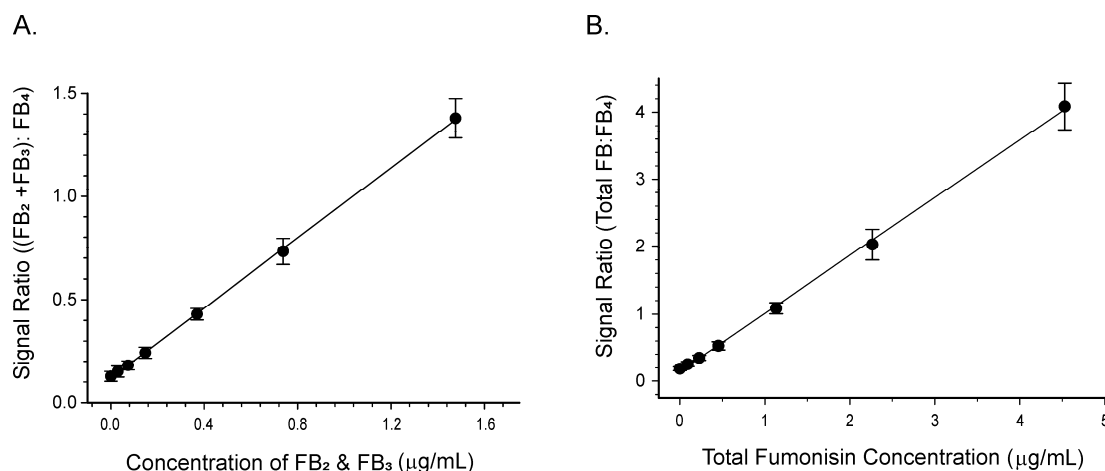

**Figure S1.** Matrix-matched calibration lines for fumonisins using the portable MS. (A) FB<sub>2</sub> and FB<sub>3</sub>, combined; (B) total fumonisins (FB). Lines represent first order regression. For FB<sub>2</sub> & FB<sub>3</sub>,  $Y = 0.1203 + 0.8478 (X)$ ,  $r^2 = 0.9997$ . Total FB fit the equation  $Y = 0.1477 + 0.8598(X)$ ,  $r^2 = 0.9992$ .
